# Supplementary material for: Delivery of targeted gene therapies using a hybrid cryogel-coated prosthetic vascular graft
Source: PeerJ. 2019 Aug 20;7:e7377. doi: 10.7717/peerj.7377 (PMC6707340; doi:10.7717/peerj.7377)
Supplement: Supplemental Information 1 — Included is the raw data for measurements of porosity of the cryogel and all hybrid materials. [file peerj-07-7377-s001.xlsx]

## Sheet: Huynh Supplemental 1 porosity
		Swelling ratio- hydrated/dried	Swelling ratio- hydrated/dried	Swelling ratio- hydrated/dried	Pore connectivity - (hydrated- dehydrated)/hydrated	Pore connectivity - (hydrated- dehydrated)/hydrated	Pore connectivity - (hydrated- dehydrated)/hydrated	Shape recovery - (rehydrated/hydrated)	Shape recovery - (rehydrated/hydrated)	Shape recovery - (rehydrated/hydrated)
cryogel		25.4537	31.7293	26.236	0.936566	0.772038	0.746449	0.716366	0.706398	0.586648
hybrid ePET		15.9626	15.5275	15.7652	0.868657	0.826883	0.77093	0.888759	0.798523	0.831793
hybrid kPET		11.0141	6.95031	8.72185	0.865618	0.708669	0.724374	0.903253	0.81412	0.939003
hybrid wPET		9.3615	7.67742	8.87436	0.800568	0.690806	0.759327	0.975092	0.834899	0.950641
ePET		23.4688	17.1842	6.79412	0.924101	0.874426	0.651515	0.430093	1.01685	0.569264
kPET		2.375	2.80973	2.3239	0.556787	0.601575	0.520974	1.04432	1.15433	1.2341
wPET		5.40865	5	3.81298	0.784	0.788833	0.725726	0.724444	0.847716	0.82983
