# Supplementary material for: Delivery of targeted gene therapies using a hybrid cryogel-coated prosthetic vascular graft
Source: PeerJ. 2019 Aug 20;7:e7377. doi: 10.7717/peerj.7377 (PMC6707340; doi:10.7717/peerj.7377)
Supplement: Supplemental Information 2 — This includes the raw data for the human aortic endothelial cell viability assay, including data points for each group over time. [file peerj-07-7377-s002.xlsx]

## Sheet: Huynh Supplemental 3 cell viabi
Time (days)	cryogels	cryogels	cryogels	ePET	ePET	ePET	wPET	wPET	wPET	kPET	kPET	kPET	cell only	cell only	cell only
0.5	1	1	1	1	1	1	1	1	1	1	1	1	1	1
3	1.29475	1.25024	1.28404	1.32683	loss	1.354	1.26381	1.25319	1.39737	1.19712	1.27043	1.1763	1.35013	1.24805
5	1.41604	1.34637	1.43622	1.15945	loss	1.51055	1.36768	1.39026	1.39547	1.36808	1.39902	1.21582	1.74836	1.71401
7	1.25702	1.44873	1.51372	1.63129	loss	1.43058	1.58417	1.48396	1.66388	1.50813	1.41041	1.28964	2.38759	1.5732
