# Supplementary material for: Delivery of targeted gene therapies using a hybrid cryogel-coated prosthetic vascular graft
Source: PeerJ. 2019 Aug 20;7:e7377. doi: 10.7717/peerj.7377 (PMC6707340; doi:10.7717/peerj.7377)
Supplement: Supplemental Information 3 — Raw data for all materials tested for release of heparin in vitro, over time. [file peerj-07-7377-s003.xlsx]

## Sheet: Huynh Supplemental 5 heparin me
Time (days)	cryogel	cryogel	cryogel	hybrid ePET	hybrid ePET	hybrid ePET	hybrid kPET	hybrid kPET	hybrid kPET	hybrid wPET	hybrid wPET	hybrid wPET
1	0.093638	0.0738402	0.0733051	0.0465515	0.0711649	0.0540425	0.0551126	0.0738402	0.0668843	0.064744	0.0706298	0.0663492
2	0.0947081	0.136979	0.119322	0.0727701	0.148216	0.145005	0.0599283	0.150356	0.115576	0.0904275	0.148751	0.117716
3	0.119322	0.182995	0.14768	0.079726	0.18246	0.189951	0.0684895	0.242389	0.165338	0.107015	0.257906	0.157311
4	0.148216	0.209749	0.192626	0.0898924	0.241853	0.197442	0.0931029	0.2563	0.203328	0.135374	0.319439	0.194231
5	0.161592	0.276098	0.225801	0.130023	0.292686	0.240248	0.24988	0.290545	0.277703	0.193697	0.371876	0.248809
6	0.173364	0.316764	0.243458	0.182995	0.325861	0.266467	0.251485	0.345658	0.332281	0.212959	0.399701	0.330141
7	0.296966	0.340843	0.269142	0.185671	0.363851	0.294291	0.349403	0.381508	0.365991	0.276633	0.450533	0.342982
8	0.375087	0.35208	0.28894	0.187276	0.386324	0.307133	0.378832	0.417893	0.379368	0.277703	0.46605	0.354754
9	0.382578	0.35208	0.290546	0.210284	0.388464	0.311949	0.408797	0.46605	0.403446	0.325325	0.496014	0.355824
10	0.386859	0.352615	0.293221	0.221521	0.390069	0.3173	0.417893	0.470866	0.403981	0.349403	0.499759	0.357965
11	0.387394	0.352615	0.293221	0.223126	0.390604	0.328001	0.438761	0.471401	0.403981	0.355824	0.502435	0.361175
12	0.387929	0.352615	0.298572	0.223126	0.390604	0.328001	0.441436	0.471936	0.409332	0.355824	0.502435	0.361175
13	0.390069	0.352615	0.298572	0.223126	0.390604	0.328001	0.441436	0.471936	0.409332	0.355824	0.502435	0.361175
14	0.390069	0.352615	0.298572	0.223126	0.390604	0.328001	0.441436	0.471936	0.409332	0.355824	0.502435	0.361175
