# Supplementary material for: Delivery of targeted gene therapies using a hybrid cryogel-coated prosthetic vascular graft
Source: PeerJ. 2019 Aug 20;7:e7377. doi: 10.7717/peerj.7377 (PMC6707340; doi:10.7717/peerj.7377)
Supplement: Supplemental Information 7 — Instron measurements and calculations of Young’s modulus for cryogel material. [file peerj-07-7377-s007.xlsx]

## Sheet: Sheet1
x	y
strain	pascals
	573.255
0.00248924	552.615
0.00228162	568.53
0.0018669	523.057
0.00228162	463.026
0.00248911	532.092
0.00186677	534.796
0.00248911	543.729
0.00228175	510.849
0.00228162	635.23
0.00207439	533.613
0.00248911	541.66
0.00248898	519.923
0.00228175	586.78
0.00186677	622.41
0.00228175	617.074
0.00186677	556.008
0.00228175	664.294
0.0018669	577.118
0.00228162	529.122
0.00228162	642.149
0.00207439	621.157
0.00228162	654.546
0.00248911	658.237
0.00207426	693.224
0.00228162	646.718
0.00248924	648.246
0.00248911	667.397
0.00228162	688.656
0.00207426	712.485
0.00228162	767.15
0.00228175	775.377
0.00186677	655.847
0.0018669	701.977
0.00207426	740.844
0.00207426	760.865
0.00228175	711.725
0.00228162	861.816
0.00207426	713.684
0.00228175	779.546
0.00228162	800.014
0.00248911	827.816
0.00248911	823.663
0.00207426	845.204
0.00248911	851.285
0.00228175	901.052
0.00228162	846.309
