# Supplementary material for: Delivery of targeted gene therapies using a hybrid cryogel-coated prosthetic vascular graft
Source: PeerJ. 2019 Aug 20;7:e7377. doi: 10.7717/peerj.7377 (PMC6707340; doi:10.7717/peerj.7377)
Supplement: Supplemental Information 8 — Instron measurements and calculations of Young’s modulus for hybrid electrospun PET. [file peerj-07-7377-s008.xlsx]

## Sheet: Sheet1
x	y
strain	pascals
	1168.37
0.00113975	1226.32
0.00124391	1197.2
0.00114042	1183.21
0.00114042	1115.64
0.00103626	1173.75
0.00114042	1165.59
0.00114042	1151.54
0.000932767	1305.81
0.00103692	1205.83
0.00103626	1139
0.00103626	1247.03
0.00103692	1101
0.00114042	1214.96
0.00113975	1321.82
0.00103692	1170.93
0.00124391	1321.68
0.00124391	1320.49
0.00114042	1153.7
0.00124391	1350.14
0.00124391	1271.16
0.00103626	1329.45
0.00114042	1245.57
0.00114042	1314.88
0.000932767	1295.95
0.00103626	1196.22
0.00103692	1241.71
0.00103692	1306.6
0.00103626	1312.63
0.00114042	1327.05
0.00103626	1342.28
0.00114042	1230.45
0.00114042	1374.8
0.00113975	1265.7
0.00114042	1269.4
0.00114042	1406.38
0.00114042	1438.85
0.00113975	1319.51
0.00103692	1422.49
0.00124391	1277.42
0.00114042	1319.73
0.000932767	1342.76
0.00114042	1388.84
0.000932767	1385.59
0.00114042	1423.95
0.00103626	1422.29
0.00114042	1373.9
0.00114042	1410.92
0.00103626	1398.01
0.00114042	1368.77
0.00114042	1468.75
0.00124391	1500.78
0.00124391	1452.59
0.00103626	1445.47
0.00124391	1422.55
0.00114042	1484.15
0.00124391	1560.89
0.000932767	1516.97
0.00103692	1546.87
0.000932767	1546.84
0.00114042	1432.79
0.000932767	1509.47
0.00103692	1516.61
0.00103626	1516.24
0.00114042	1580.99
0.00113975	1485
0.00103692	1603.64
0.00124391	1511.25
0.00114042	1537.81
0.00124391	1631.25
0.00113975	1476.99
0.00114042	1663.95
0.00114042	1607.74
0.00114042	1615.97
0.00103626	1618.01
0.00114042	1645.26
0.00103692	1570.72
0.000932767	1625.65
0.00103626	1703.71
0.00114042	1722.92
0.00114042	1652.49
0.00103626	1701.21
0.00114042	1642.89
0.00114042	1703.74
0.00113975	1762.19
0.00114042	1688.86
0.00114042	1767.74
0.00114042	1757.84
0.00124391	1721.83
