# Supplementary material for: Delivery of targeted gene therapies using a hybrid cryogel-coated prosthetic vascular graft
Source: PeerJ. 2019 Aug 20;7:e7377. doi: 10.7717/peerj.7377 (PMC6707340; doi:10.7717/peerj.7377)
Supplement: Supplemental Information 9 — Instron measurements and calculations of Young’s modulus for hybrid electrospun PET. [file peerj-07-7377-s009.xlsx]

## Sheet: Sheet1
x	y
strain	pascals
	692.983
0.00121715	778.936
0.00148811	737.891
0.00148811	762.512
0.0013522	771.688
0.00135306	734.71
0.00148725	772.174
0.00148811	794.514
0.00148811	817.803
0.00148811	803.533
0.00162316	845.934
0.0017582	755.702
0.00148811	829.839
0.0013522	844.539
0.00148811	829.518
0.00162316	925.775
0.0013522	865.414
0.00121802	792.704
0.00148811	876.753
0.0013522	797.406
0.00148811	905.198
0.00121715	874.787
0.00148811	969.461
0.00121715	913.802
0.0013522	877.991
0.00135306	824.816
0.00148811	883.602
0.00162316	970.425
0.0013522	942.905
0.00162316	992.797
0.00148811	1006.12
0.00148811	948.978
0.00162316	871.848
0.0013522	1016.87
0.00162316	934.771
0.00135306	1055.88
0.00121715	1056.64
0.0013522	1001.26
0.00135306	1055.79
0.00148811	1017.65
0.00162316	996.002
0.00121715	1114.44
0.00148811	995.641
0.00162316	1063.62
0.00162316	1100.57
0.00162316	1125.36
0.00148725	1053.67
0.00135306	1131.2
0.00148811	1064.74
0.0013522	1104.34
0.00135306	1135.55
0.0013522	1086.76
0.00135306	1160.49
0.00121715	1081.96
0.00148811	1089.67
0.0013522	1146.03
0.00148811	1116.43
0.00148811	1195.15
0.00148725	1245.2
0.00135306	1162.26
0.00148811	1178.4
0.00162316	1186.86
0.00162316	1138.92
0.00162316	1215.94
0.0013522	1246
0.00135306	1306.42
0.00148725	1278.04
0.00135306	1135.62
0.00162316	1228.92
0.0013522	1252.36
0.00121802	1262.4
0.00162316	1230.44
0.00121715	1269.94
