# Supplementary material for: Delivery of targeted gene therapies using a hybrid cryogel-coated prosthetic vascular graft
Source: PeerJ. 2019 Aug 20;7:e7377. doi: 10.7717/peerj.7377 (PMC6707340; doi:10.7717/peerj.7377)
Supplement: Supplemental Information 11 — Instron measurements and calculations of Young’s modulus for hybrid knitted PET. [file peerj-07-7377-s011.xlsx]

## Sheet: Sheet1
x	y
strain	pascals
	693.447
0.00119882	783.444
0.000980538	836.439
0.00119882	790.301
0.00119813	813.715
0.00109003	885.783
0.00130762	811.583
0.00130762	782.566
0.00119882	874.781
0.00130762	873.989
0.00130762	924.148
0.000980538	925.809
0.00130762	912.127
0.00119882	947.577
0.000871745	914.055
0.00108933	923.513
0.00119882	1023.99
0.000980538	1004.92
0.00109003	970.176
0.00108933	1105.26
0.00109003	1038.69
0.00130762	983.835
0.00119813	1091.09
0.00109003	1120.04
0.00130762	1072.69
0.00119882	1145.73
0.00130762	1175.62
0.00119813	1141.61
0.00119882	1142.33
0.00119882	1200.05
0.00119882	1132.35
0.000980538	1133.93
0.00119882	1275.67
0.000980538	1175.93
0.00119882	1189.26
0.00108933	1244.2
0.00109003	1156.75
0.00130762	1327.15
0.00108933	1268.81
0.00109003	1333.65
0.00130762	1290.65
0.00130762	1367.48
0.00108933	1299.29
0.00119882	1273.34
0.00130762	1372.43
0.00119882	1336.94
0.00130762	1353.88
0.000980538	1375.46
0.000980538	1382.44
0.00109003	1343.26
0.00119882	1395.3
0.000980538	1369.75
0.00119813	1492.86
0.00109003	1430.17
0.00119882	1480.04
0.00119813	1425.13
0.00119882	1559.77
0.00119882	1470.8
0.00119882	1498.78
0.00130762	1577.7
0.00130762	1581.41
0.00108933	1548.47
0.00119882	1616.19
0.00119882	1603.11
0.00108933	1562.32
0.00119882	1725.98
0.000980538	1564.23
0.00109003	1657.01
0.000980538	1708.3
0.00119882	1667.06
0.00119813	1657.18
0.00109003	1705.23
0.00119882	1664.16
0.00119813	1672.28
0.00109003	1795.03
0.00130762	1800.76
0.00130762	1753.83
0.00119882	1854.8
0.00130762	1771.39
0.00119813	1712.84
0.00119882	1912.64
0.00109003	1840.41
0.000980538	1909.42
0.00119882	1924.69
0.00108933	1883.18
0.00109003	1908.91
0.00108933	1946.62
0.00119882	1962.82
0.00119882	1985.55
0.000980538	1952.44
0.00130762	2033
0.00119882	2093.56
0.00108933	1992.09
