# Supplementary material for: Delivery of targeted gene therapies using a hybrid cryogel-coated prosthetic vascular graft
Source: PeerJ. 2019 Aug 20;7:e7377. doi: 10.7717/peerj.7377 (PMC6707340; doi:10.7717/peerj.7377)
Supplement: Supplemental Information 13 — Instron measurements and calculations of Young’s modulus for hybrid knitted PET. [file peerj-07-7377-s013.xlsx]

## Sheet: Sheet1
x	y
strain	pascals
	1385.75
0.000969048	1409.71
0.000880543	1409
0.000969048	1462.6
0.000969048	1357.68
0.00105699	1467.27
0.00105699	1421.77
0.00105699	1351.8
0.000880543	1542.5
0.00105699	1507.46
0.000969048	1412.85
0.00105699	1408.8
0.000792601	1472.94
0.000881106	1423.31
0.000880543	1484.86
0.000881106	1409.55
0.000968484	1467.14
0.000881106	1459.69
0.000881106	1430.48
0.000792601	1392.6
0.000880543	1493.38
0.000881106	1445.97
0.00105699	1547.77
0.000968484	1499.58
0.000969048	1550.43
0.000969048	1492.23
0.00105699	1462.2
0.000969048	1481.27
0.000968484	1510.3
0.000969048	1482.76
0.000969048	1600.34
0.000880543	1578.2
0.000793165	1460.53
0.000968484	1526.82
0.000881106	1506.31
0.000969048	1503.18
0.000880543	1655.98
0.000969048	1557.42
0.000969048	1523.86
0.000880543	1601.22
0.000969048	1553.9
0.00123344	1416.08
0.000968484	1642.64
0.000969048	1555.29
0.000969048	1489.38
0.000792601	1667.17
0.000969048	1609.04
0.000792601	1497.29
0.000969048	1620.02
0.000792601	1586.99
0.000969048	1662.9
0.000880543	1595.27
0.000881106	1685.74
0.000969048	1639.14
0.000880543	1569.63
0.00105699	1679.93
0.000969048	1604.4
0.000968484	1626.19
0.000969048	1725.29
0.00105699	1611.03
0.000969048	1669.18
0.000969048	1690.93
0.000880543	1676.82
0.000969048	1685.69
0.00105699	1644.42
0.00070466	1705.61
0.000969048	1823.47
0.000968484	1694.45
0.000881106	1633.12
0.000880543	1762.48
0.000793165	1666.08
0.000969048	1701.66
0.000880543	1778.94
0.000969048	1770.65
0.00105699	1675.09
0.00105699	1755.29
0.00105699	1769.76
0.000880543	1698.23
0.000969048	1763.01
0.00105699	1852.62
0.000969048	1797.99
0.000792601	1826.73
0.000969048	1783.97
0.000792601	1689.42
0.000969048	1774.45
0.000792601	1814.78
0.000969048	1813.05
0.000880543	1897.02
0.000881106	1821.55
0.00105699	1764.38
0.000880543	1840.89
0.00105699	1810.58
0.000969048	1794.69
0.00105699	1855.08
0.000969048	1946.49
0.000792601	1881.16
0.000969048	1868.53
0.000968484	1860.12
0.000969048	1816.31
0.000881106	1889.22
0.000792601	1889.96
0.000880543	1932.31
0.000969048	1832.89
0.000969048	1933.81
0.000969048	1954.89
0.000792601	1810.08
0.00105699	1814.91
0.000969048	1940.95
