# Supplementary material for: Delivery of targeted gene therapies using a hybrid cryogel-coated prosthetic vascular graft
Source: PeerJ. 2019 Aug 20;7:e7377. doi: 10.7717/peerj.7377 (PMC6707340; doi:10.7717/peerj.7377)
Supplement: Supplemental Information 14 — Instron measurements and calculations of Young’s modulus for hybrid woven PET. [file peerj-07-7377-s014.xlsx]

## Sheet: Sheet1
x	y
strain	pascals
	510.794
0.00180636	634.532
0.00198694	581.365
0.00180647	656.732
0.00198694	659.333
0.00216763	664.2
0.00216763	629.941
0.00198694	660.211
0.00198705	687.042
0.00198705	762.072
0.00216751	669.763
0.00216775	751.203
0.00198694	739.48
0.00144509	726.097
0.00162578	790.744
0.00198694	781.293
0.00180636	707.933
0.00180636	893.161
0.00180636	797.78
0.00180636	793.761
0.00216763	886.163
0.00180636	827.918
0.00198694	840.087
0.00216775	937.559
0.00198694	874.989
0.00198694	903.285
0.00180647	967.478
0.00198694	907.735
0.00198705	929.802
0.00216763	926.197
0.00180636	1047.77
0.00180636	987.89
0.00162566	1057.07
0.00180636	1137.73
0.00198705	994.128
0.00198694	1037.13
0.00180636	1069.27
0.00198705	1036.78
0.00198694	1103.35
0.00180636	1202.17
0.00216763	1139.84
0.00216763	1171.28
0.00198705	1212.22
0.00198694	1121.08
0.00216763	1195.06
0.00180636	1303.58
0.00198705	1366.79
0.00180636	1287.57
0.00180636	1344.7
0.00180624	1336.04
0.00162578	1284.04
0.00162578	1319.31
0.00198694	1451.2
