# Supplementary material for: Delivery of targeted gene therapies using a hybrid cryogel-coated prosthetic vascular graft
Source: PeerJ. 2019 Aug 20;7:e7377. doi: 10.7717/peerj.7377 (PMC6707340; doi:10.7717/peerj.7377)
Supplement: Supplemental Information 15 — Instron measurements and calculations of Young’s modulus for hybrid woven PET. [file peerj-07-7377-s015.xlsx]

## Sheet: Sheet1
x	y
strain	pascals
	573.907
0.000815516	553.956
0.000815516	626.581
0.00090658	719.539
0.00108755	656.498
0.000815516	683.564
0.000997064	716.679
0.000996484	577.707
0.00090658	612.311
0.000997064	747.326
0.000996484	623.195
0.00117861	831.563
0.00108755	751.369
0.000906	708.036
0.000997064	672.648
0.000997064	684.575
0.000815516	714.211
0.000997064	703.115
0.000815516	784.586
0.000906	796.716
0.00090658	765.693
0.000997064	750.539
0.000906	762.058
0.000997064	746.526
0.000997064	843.717
0.000906	753.783
0.000997064	825.466
0.000997064	810.625
0.00108755	769.839
0.00108755	830.858
0.00108755	878.493
0.000815516	829.142
0.000997064	843.246
0.000996484	888.695
0.00090658	847.188
0.000997064	902.557
0.000815516	893.891
0.000997064	871.237
0.00108755	851.122
0.000815516	958.515
0.000815516	962.362
0.00090658	925.94
0.000996484	940.891
0.00090658	898.357
0.000997064	915.08
0.00108755	1065.01
0.00108755	928.299
0.00108755	998.988
0.000996484	1012.58
0.000997064	1006.71
0.000997064	992.366
0.000997064	990.031
0.000815516	987.328
0.000997064	1037.54
0.000815516	1064.17
0.000997064	1039.65
0.000815516	991.692
0.000997064	1051.63
0.000906	1077.33
0.000997064	1010.56
0.000997064	1096.34
0.000996484	1096.8
0.000997064	1113.2
0.00108755	1156.88
0.00108755	1087.7
0.00090658	1049
0.000815516	1159.02
0.000997064	1108.95
0.00108755	1087.69
0.000906	1169.66
0.00090658	1144.66
0.000815516	1097.67
0.000997064	1154.16
0.000906	1086.5
0.000997064	1095.33
0.000997064	1250.64
0.000906	1257.69
0.000997064	1206.99
0.000997064	1233.44
0.00108755	1205.49
0.00108755	1206.12
0.00108755	1215.95
0.000906	1288.18
0.000997064	1267.45
0.000997064	1290.26
0.000906	1286.66
0.00090658	1163.04
0.000906	1333.48
0.000997064	1290.85
0.00090658	1271
0.000815516	1404.79
0.000815516	1342.17
0.000997064	1263.29
0.000996484	1453.15
0.00090658	1280.51
0.00108755	1330.62
0.000997064	1348.63
0.000997064	1381.53
0.00117803	1398.63
0.000906	1459.24
0.000997064	1384.57
0.000997064	1407.93
0.000996484	1390.06
0.000997064	1429.72
0.00090658	1418.8
