# Supplementary material for: Delivery of targeted gene therapies using a hybrid cryogel-coated prosthetic vascular graft
Source: PeerJ. 2019 Aug 20;7:e7377. doi: 10.7717/peerj.7377 (PMC6707340; doi:10.7717/peerj.7377)
Supplement: Supplemental Information 16 — Instron measurements and calculations of Young’s modulus for hybrid woven PET. [file peerj-07-7377-s016.xlsx]

## Sheet: Sheet1
x	y
strain	pascals
	676.679
0.000892168	708.384
0.000991156	681.718
0.000991791	645.406
0.00109078	759.373
0.00109015	723.704
0.00109078	776.518
0.00109078	806.906
0.00118977	773.399
0.00109078	885.368
0.00118977	943.402
0.000892168	841.15
0.00109078	830.853
0.00118977	883.19
0.00109078	895.563
0.000892168	933.168
0.000991156	1035.69
0.000991791	931.766
0.000991156	1009.05
0.00109078	1027.39
0.00109078	902.733
0.000892168	1043.81
0.00118977	1131.31
0.00109078	1055.43
0.00118977	1113.88
0.00118977	1204.49
0.000991156	1178.19
0.00109078	1160.11
0.00109078	1156.13
0.00109015	1214.69
0.000991791	1216.1
0.000991156	1314.48
0.000991791	1245.94
0.00109078	1266.81
0.000892168	1333.58
0.00109078	1263.17
0.000991156	1317.89
0.000991791	1372.06
0.00118977	1340.05
0.000991156	1409.57
0.00109078	1429.72
0.00109078	1372.48
0.00118977	1409.83
0.00118977	1507.15
0.000991156	1490.52
0.00109078	1515.4
0.00109078	1627.89
0.00109015	1498.28
0.000991791	1586.56
0.000892168	1579.13
0.000991791	1593.22
0.000991156	1630.39
0.000991791	1735.72
0.00109078	1683.39
0.000991156	1698.6
0.00109078	1694.13
0.000991156	1619.69
0.00109078	1765.2
0.00118977	1763.29
0.00118977	1773.48
0.00109078	1845.84
0.00118977	1778.89
0.00109015	1805.11
0.00128939	1785.48
0.000793179	1874.05
0.000892168	1850.52
0.00109078	1912.33
0.000991156	1929.35
0.000991791	1915.27
0.000991156	1863.81
0.00109078	1944.58
0.00109078	1938.22
0.000892168	1921.2
0.00118977	2048.19
0.00109078	2039.43
0.00109015	1977.4
0.00109078	1986.97
0.00109078	2016.1
0.00109078	2068.83
0.000991156	2124.12
0.00109078	2105.86
0.00118977	2160.81
0.000991156	2106.04
0.000991791	2087.7
0.000892168	2212.57
0.00109078	2133.72
0.00109078	2198.37
0.000991156	2212.32
0.00109078	2270.79
0.000991791	2208.79
0.000991156	2246.43
0.00118977	2195.13
0.00109078	2263.26
0.00128876	2398.13
0.00109078	2408.01
0.00109015	2354
